# Supplementary material for: Comparative transcriptome analysis provides insights into grain filling commonalities and differences between foxtail millet [Setaria italica (L.) P. Beauv.] varieties with different panicle types
Source: PeerJ journal article supplement (doi:10.7717/peerj.12968), 2022-02-18

# Y2 vs Y1

GO Term

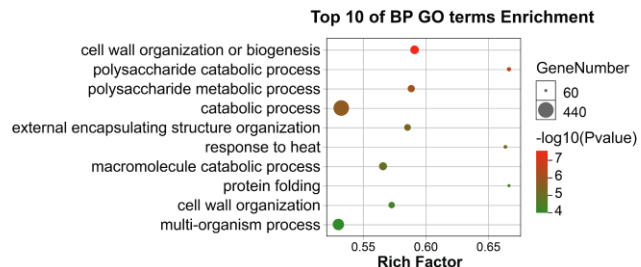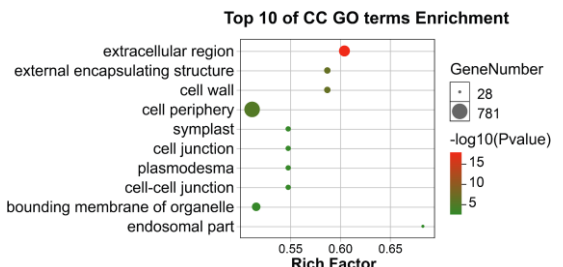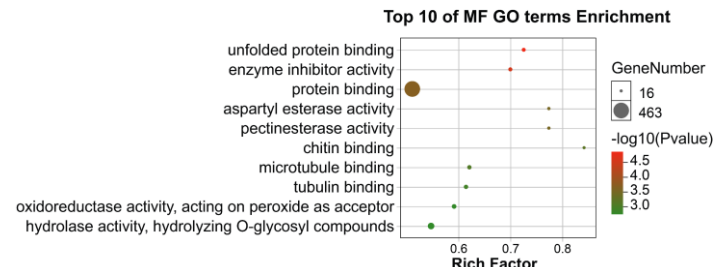

# Y3 vs Y2

GO Term

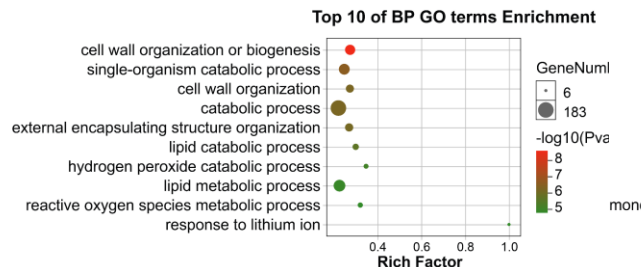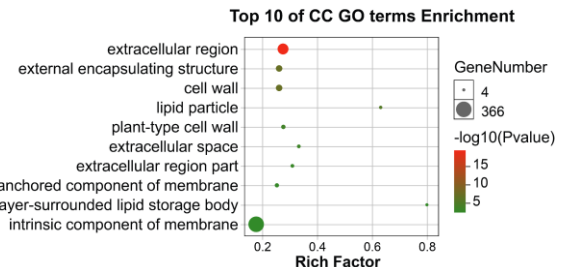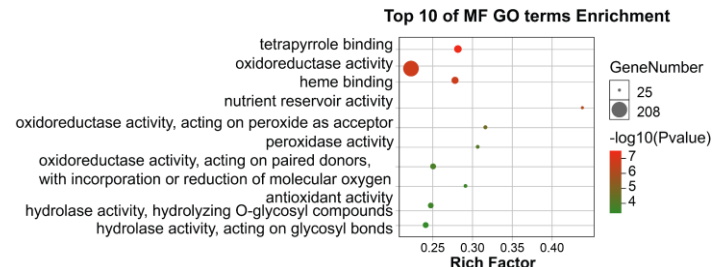

# Y4 vs Y3

GO Term

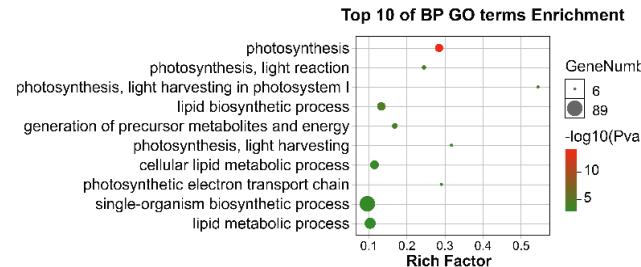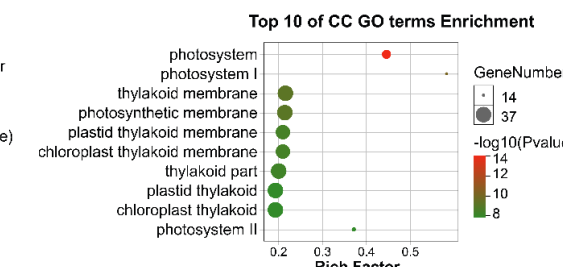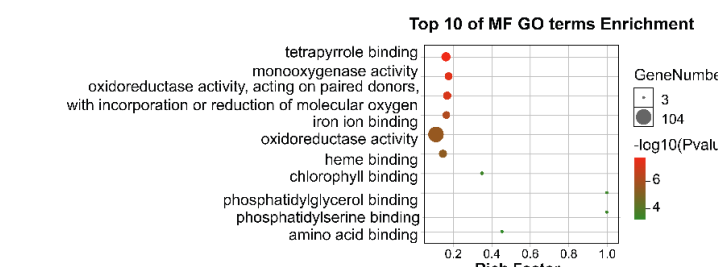

# Y5 vs Y4

GO Term

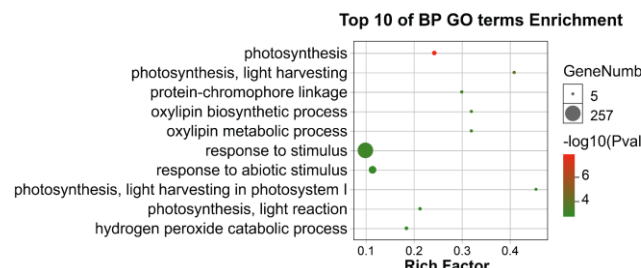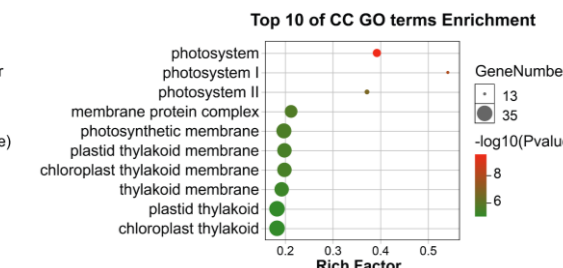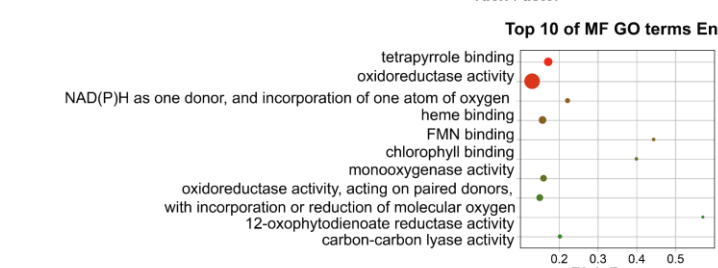

# Y6 vs Y5

GO Term

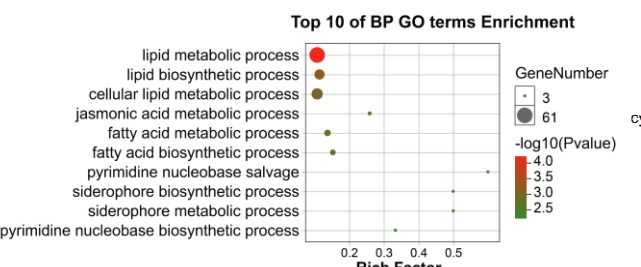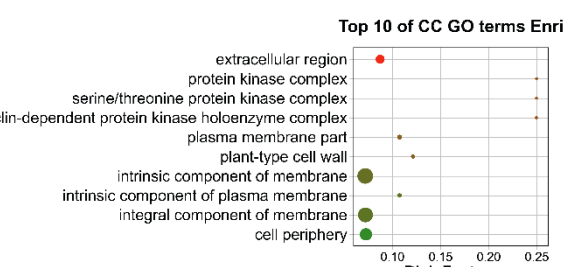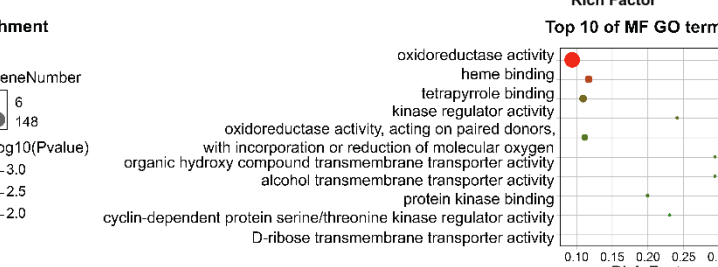

Supplement: Fig_S1.pdf [file Fig_S1.pdf]
