# Supplementary material for: Comparative transcriptome analysis provides insights into grain filling commonalities and differences between foxtail millet [Setaria italica (L.) P. Beauv.] varieties with different panicle types
Source: PeerJ. 2022 Feb 18;10:e12968. doi: 10.7717/peerj.12968 (PMC8860066; doi:10.7717/peerj.12968)
Supplement: Supplemental Information 6 [file peerj-10-12968-s006.xlsx]

## Sheet: LOC101752662(Seita.3G020300)
	Y1	Y2	Y3	Y4	Y5	Y6
replicate 1	0.0363948	0.149898	0.147214	0.154453	0.297296	0.172598
replicate 2	0.0367903	0.15567	0.128843	0.147767	0.234227	0.187659
replicate 3	0.0363423	0.143791	0.198513	0.130731	0.165499	0.239322
FPKM	40.417	42.3872	52.1872	66.1197	74.8738	72.9627
	Z1	Z2	Z3	Z4	Z5	Z6
replicate 1	0.0580986	0.133977	0.178396	0.113479	0.148046	0.20051
replicate 2	0.0705857	0.119375	0.118368	0.148588	0.139541	0.18209
replicate 3	0.0789738	0.125139	0.146936	0.0901183	0.143417	0.231567
FPKM	30.5496	40.2289	48.4409	55.7594	69.4619	77.7441

## Sheet: LOC101776017（Seita.7G193900）
	Y1	Y2	Y3	Y4	Y5	Y6
replicate 1	0.00136465	0.0244913	0.0710712	0.0891202	0.0443149	0.0444691
replicate 2	0.00124072	0.0230346	0.0666663	0.0768222	0.0396449	0.0419504
replicate 3	0.0019064	0.0251402	0.0672216	0.0731759	0.0413502	0.0415101
FPKM	0.606822	9.90902	26.8296	28.9225	16.5356	16.4764
	Z1	Z2	Z3	Z4	Z5	Z6
replicate 1	0.00325245	0.015083	0.0709954	0.113206	0.0375532	0.00488186
replicate 2	0.00305878	0.0137063	0.070147	0.103635	0.0367569	0.00517786
replicate 3	0.00489162	0.0124099	0.0609444	0.0863287	0.0379124	0.00557092
FPKM	1.18891	5.0241	23.8966	31.6855	14.4451	9.43398

## Sheet: LOC101752618（Seita.1G251000）
	Y1	Y2	Y3	Y4	Y5	Y6
replicate 1	0.0223449	0.00273138	0.000730494	0.00925603	0.00637158	0.00636408
replicate 2	0.0144511	0.00276134	0.000498259	0.00720843	0.00626006	0.00904636
replicate 3	0.0157536	0.0028452	0.000593157	0.00675497	0.00566316	0.00662265
FPKM	2.58179	0.2041	0.200758	0.473583	0.424091	0.421487
	Z1	Z2	Z3	Z4	Z5	Z6
replicate 1	0.869395	0.124317	0.214295	0.102515	0.391963	0.225548
replicate 2	1.07673	0.115334	0.210119	0.10277	0.298249	0.238719
replicate 3	1.05688	0.109827	0.225182	0.117314	0.220551	0.229266
FPKM	16.9308	3.86515	1.88403	2.2106	3.75501	2.97304

## Sheet: LOC101753059（Seita.7G001200）
	Y1	Y2	Y3	Y4	Y5	Y6
replicate 1	0.0266294	0.100058	0.0821392	0.132678	0.237648	0.192985
replicate 2	0.0254398	0.083215	0.081444	0.128301	0.234346	0.171153
replicate 3	0.0206866	0.087947	0.0859203	0.0830757	0.25102	0.19545
FPKM	3.55208	4.72451	3.72849	4.6246	5.49262	4.86827
	Z1	Z2	Z3	Z4	Z5	Z6
replicate 1	0.0560404	0.0599742	0.120315	0.0611367	0.105893	0.0351965
replicate 2	0.0580475	0.0526108	0.127387	0.0640151	0.119895	0.0445891
replicate 3	0.0723018	0.0565193	0.116253	0.0679451	0.0984307	0.040471
FPKM	0.81633	1.20487	1.58948	1.29315	1.16511	0.919533

## Sheet: LOC101753929（Seita.4G210500）
	Y1	Y2	Y3	Y4	Y5	Y6
replicate 1	0.00200619	0.00817563	0.00897746	0.0159984	0.0205554	0.0261794
replicate 2	0.00287808	0.0069275	0.00945036	0.0167358	0.0176904	0.0255794
replicate 3	0.00196702	0.00701615	0.00854584	0.0114921	0.0198593	0.0246001
FPKM	0.305909	0.457555	0.608761	0.781813	0.73525	0.880741
	Z1	Z2	Z3	Z4	Z5	Z6
replicate 1	0.00180723	0.00730115	0.0041537	0.00262474	0.00964832	0.0143968
replicate 2	0.00153476	0.00800338	0.00464664	0.00249995	0.00894376	0.0154375
replicate 3	0.00240196	0.00997706	0.0042273	0.00282602	0.00752775	0.0133096
FPKM	0.068399	0.130868	0.0649746	0.0934516	0.0945916	0.114012

## Sheet: LOC101758231（Seita.9G022400）
	Y1	Y2	Y3	Y4	Y5	Y6
replicate 1	0.547724	0.520359	0.372039	0.643497	0.474174	0.737382
replicate 2	0.643697	0.460848	0.386319	0.729003	0.414912	0.713798
replicate 3	0.65647	0.426901	0.443224	0.664727	0.465956	0.67209
FPKM	79.2865	42.333	36.0909	41.9005	35.5502	39.1627
	Z1	Z2	Z3	Z4	Z5	Z6
replicate 1	0.0554983	0.162362	0.0935362	0.0874506	0.120612	0.126724
replicate 2	0.0653341	0.146292	0.112043	0.0830348	0.0655572	0.134537
replicate 3	0.0598165	0.130441	0.112551	0.0921085	0.0648666	0.154454
FPKM	7.65724	15.076	8.6188	5.10956	7.82548	7.20068

## Sheet: LOC101771419（Seita.7G291500）
	Y1	Y2	Y3	Y4	Y5	Y6
replicate 1	0.157828	0.173224	0.0769296	0.0864062	0.0659584	0.0125018
replicate 2	0.136718	0.150163	0.0750398	0.079881	0.0332671	0.0139103
replicate 3	0.215054	0.156919	0.0742424	0.0724264	0.0723945	0.0112505
FPKM	131.385	48.9762	38.5884	28.4157	12.0035	12.9963
	Z1	Z2	Z3	Z4	Z5	Z6
replicate 1	1.21041	0.72241	0.552937	0.441103	0.269523	0.48767
replicate 2	1.26242	0.544764	0.460753	0.434672	0.327432	0.453187
replicate 3	1.07808	0.716693	0.600047	0.437517	0.272591	0.449236
FPKM	442.557	358.569	179.528	125.666	68.0636	259.666

## Sheet: LOC106804454（Seita.8G051500）
	Y1	Y2	Y3	Y4	Y5	Y6
replicate 1	0.424135	0.537999	0.369727	0.339934	0.260092	0.438944
replicate 2	0.414047	0.433126	0.376787	0.353348	0.248505	0.429177
replicate 3	0.497439	0.49224	0.382919	0.331964	0.255086	0.429809
FPKM	20.3826	14.6231	12.0117	13.4178	9.30088	27.3368
	Z1	Z2	Z3	Z4	Z5	Z6
replicate 1	4.95737	1.365	1.11301	1.16251	1.00832	1.05948
replicate 2	5.63449	1.34796	1.12866	1.02175	0.870134	1.14095
replicate 3	5.18658	1.36867	1.13872	1.18731	0.935762	1.17069
FPKM	255.296	179.158	137.073	121.982	77.4945	183.149

## Sheet: LOC101777028（Seita.4G137900）
	Y1	Y2	Y3	Y4	Y5	Y6
replicate 1	0.0573364	0.0384205	0.030765	0.00635069	0.00425426	0.00453455
replicate 2	0.0468736	0.0357041	0.0259453	0.00683564	0.00425545	0.00358952
replicate 3	0.0528696	0.0395115	0.0341611	0.0058892	0.00402211	0.00383186
FPKM	54.3244	25.2929	14.6912	6.60332	3.28862	2.50028
	Z1	Z2	Z3	Z4	Z5	Z6
replicate 1	0.221741	0.126331	0.0450082	0.12849	0.0224915	0.0209357
replicate 2	0.213343	0.139368	0.0335834	0.129148	0.0272103	0.0464823
replicate 3	0.241001	0.112519	0.0526747	0.105615	0.0400147	0.0378245
FPKM	162.762	88.8747	40.6731	43.2873	14.018	69.0327

## Sheet: LOC101764179（Seita.9G346800）
	Y1	Y2	Y3	Y4	Y5	Y6
replicate 1	0.223239	0.263627	0.830793	0.325247	0.264565	0.319714
replicate 2	0.278569	0.239994	0.713136	0.412573	0.272253	0.338589
replicate 3	0.208297	0.252472	0.80137	0.386059	0.341107	0.403258
FPKM	31.513	31.5322	57.1015	50.3198	22.4211	29.7542
	Z1	Z2	Z3	Z4	Z5	Z6
replicate 1	0.0284269	0.0540372	0.0455714	0.0222644	0.0320138	0.0209357
replicate 2	0.024786	0.049612	0.0496341	0.0272755	0.0228711	0.0464823
replicate 3	0.0282559	0.0561024	0.0481561	0.0280481	0.0338935	0.0378245
FPKM	2.02237	6.22984	7.47033	3.68915	3.57195	5.74626

[truncated: 3 more sheets: LOC101774566（Seita.8G199700）, LOC101762122（Seita.8G118500）, LOC101780767（Seita.8G055600）]
