# Supplementary material for: Comparative transcriptome analysis provides insights into grain filling commonalities and differences between foxtail millet [Setaria italica (L.) P. Beauv.] varieties with different panicle types
Source: PeerJ. 2022 Feb 18;10:e12968. doi: 10.7717/peerj.12968 (PMC8860066; doi:10.7717/peerj.12968)
Supplement: Supplemental Information 7 [file peerj-10-12968-s007.xlsx]

## Sheet: Sheet1
	T1	T2	T3	T4	T5	T6
YG	0.148	1.356	5.168	6.746	11.172	14.538
YG	0.15	0.946	4.666	8.186	11.656	13.678
YG	0.202	1.46	6.734	7.806	12.544	16.43
ZG	1.76	2.194	6.85	8.64	11.264	13.934
ZG	0.95	3.242	6.284	7.358	11.602	14.3
ZG	2.012	3.595	6.616	7.56	11.462	12.6
