# Supplementary material for: Comparative transcriptome analysis provides insights into grain filling commonalities and differences between foxtail millet [Setaria italica (L.) P. Beauv.] varieties with different panicle types
Source: PeerJ. 2022 Feb 18;10:e12968. doi: 10.7717/peerj.12968 (PMC8860066; doi:10.7717/peerj.12968)
Supplement: Supplemental Information 8 [file peerj-10-12968-s008.xlsx]

## Sheet: Sheet1
NCBI ID
CIPK1
CIPK2
LOC101752474
LOC101752479
LOC101752490
LOC101752493
LOC101752498
LOC101752514
LOC101752593
LOC101752604
LOC101752612
LOC101752618
LOC101752641
LOC101752646
LOC101752659
LOC101752674
LOC101752679
LOC101752691
LOC101752715
LOC101752724
LOC101752737
LOC101752743
LOC101752747
LOC101752748
LOC101752772
LOC101752775
LOC101752787
LOC101752790
LOC101752793
LOC101752815
LOC101752818
LOC101752830
LOC101752835
LOC101752925
LOC101752932
LOC101752936
LOC101752941
LOC101752947
LOC101752949
LOC101752959
LOC101752961
LOC101752965
LOC101752969
LOC101753030
LOC101753059
LOC101753074
LOC101753078
LOC101753105
LOC101753109
LOC101753112
LOC101753118
LOC101753123
LOC101753126
LOC101753128
LOC101753131
LOC101753135
LOC101753137
LOC101753140
LOC101753184
LOC101753203
LOC101753213
LOC101753230
LOC101753233
LOC101753271
LOC101753278
LOC101753295
LOC101753308
LOC101753320
LOC101753354
LOC101753377
LOC101753383
LOC101753395
LOC101753410
LOC101753418
LOC101753423
LOC101753454
LOC101753470
LOC101753474
LOC101753477
LOC101753495
LOC101753498
LOC101753501
LOC101753510
LOC101753540
LOC101753547
LOC101753549
LOC101753551
LOC101753576
LOC101753578
LOC101753617
LOC101753624
LOC101753626
LOC101753654
LOC101753655
LOC101753711
LOC101753713
LOC101753730
LOC101753744
LOC101753759
LOC101753762
LOC101753766
LOC101753770
LOC101753798
LOC101753799
LOC101753814
LOC101753823
LOC101753824
LOC101753848
LOC101753858
LOC101753867
LOC101753873
LOC101753874
LOC101753876
LOC101753878
LOC101753881
LOC101753889
LOC101753890
LOC101753894
LOC101753900
LOC101753926
LOC101753929
LOC101753940
LOC101753942
LOC101753967
LOC101754040
LOC101754053
LOC101754057
LOC101754069
LOC101754104
LOC101754125
LOC101754226
LOC101754236
LOC101754239
LOC101754258
LOC101754261
LOC101754265
LOC101754322
LOC101754325
LOC101754332
LOC101754345
LOC101754349
LOC101754373
LOC101754423
LOC101754443
LOC101754444
LOC101754465
LOC101754470
LOC101754495
LOC101754496
LOC101754517
LOC101754527
LOC101754535
LOC101754561
LOC101754593
LOC101754602
LOC101754634
LOC101754642
LOC101754645
LOC101754650
LOC101754661
LOC101754667
LOC101754685
LOC101754687
LOC101754696
LOC101754716
LOC101754720
LOC101754728
LOC101754749
LOC101754757
LOC101754771
LOC101754814
LOC101754826
LOC101754827
LOC101754833
LOC101754836
LOC101754841
LOC101754848
LOC101754852
LOC101754863
LOC101754864
LOC101754870
LOC101754871
LOC101754889
LOC101754895
LOC101754899
LOC101754923
LOC101754941
LOC101755015
LOC101755043
LOC101755053
LOC101755057
LOC101755065
LOC101755076
LOC101755098
LOC101755113
LOC101755118
LOC101755154
LOC101755178
LOC101755183
LOC101755202
LOC101755221
LOC101755234
LOC101755263
LOC101755265
LOC101755272
LOC101755300
LOC101755316
LOC101755347
LOC101755352
LOC101755362
LOC101755393
LOC101755399
LOC101755430
LOC101755460
LOC101755471
LOC101755475
LOC101755479
LOC101755506
LOC101755517
LOC101755523
LOC101755530
LOC101755544
LOC101755563
LOC101755574
LOC101755599
LOC101755606
LOC101755657
LOC101755679
LOC101755707
LOC101755734
LOC101755754
LOC101755798
LOC101755840
LOC101755884
LOC101755917
LOC101755936
LOC101755962
LOC101755979
LOC101756038
LOC101756042
LOC101756048
LOC101756054
LOC101756057
LOC101756087
LOC101756129
LOC101756194
LOC101756196
LOC101756234
LOC101756256
LOC101756265
LOC101756288
LOC101756322
LOC101756327
LOC101756380
LOC101756449
LOC101756497
LOC101756512
LOC101756513
LOC101756515
LOC101756530
LOC101756551
LOC101756583
LOC101756584
LOC101756585
LOC101756604
LOC101756616
LOC101756631
LOC101756632
LOC101756663
LOC101756668
LOC101756676
LOC101756682
LOC101756717
LOC101756722
LOC101756745
LOC101756779
LOC101756800
LOC101756802
LOC101756825
LOC101756881
LOC101756883
LOC101756916
LOC101756926
LOC101756928
LOC101756943
LOC101756947
LOC101756950
LOC101756964
LOC101756969
LOC101757014
LOC101757023
LOC101757032
LOC101757036
LOC101757067
LOC101757075
LOC101757110
LOC101757120
LOC101757152
LOC101757169
LOC101757184
LOC101757189
LOC101757205
LOC101757212
LOC101757233
LOC101757237
LOC101757239
LOC101757249
LOC101757255
LOC101757270
LOC101757283
LOC101757284
LOC101757286
LOC101757299
LOC101757313
LOC101757321
LOC101757343
LOC101757369
LOC101757439
LOC101757499
LOC101757503
LOC101757508
LOC101757536
LOC101757561
LOC101757563
LOC101757598
LOC101757612
LOC101757615
LOC101757619
LOC101757622
LOC101757624
LOC101757629
LOC101757630
LOC101757640
LOC101757642
LOC101757647
LOC101757649
LOC101757670
LOC101757687
LOC101757690
LOC101757693
LOC101757726
LOC101757739
LOC101757740
LOC101757742
LOC101757754
LOC101757759
LOC101757792
LOC101757802
LOC101757823
LOC101757872
LOC101757880
LOC101757915
LOC101757923
LOC101757926
LOC101757930
LOC101757966
LOC101758001
LOC101758026
LOC101758031
LOC101758039
LOC101758074
LOC101758085
LOC101758097
LOC101758121
LOC101758122
LOC101758127
LOC101758170
LOC101758173
LOC101758187
LOC101758191
LOC101758196
LOC101758209
LOC101758210
LOC101758231
LOC101758248
LOC101758250
LOC101758261
LOC101758293
LOC101758298
LOC101758338
LOC101758356
LOC101758376
LOC101758405
LOC101758418
LOC101758419
LOC101758472
LOC101758480
LOC101758488
LOC101758489
LOC101758504
LOC101758512
LOC101758524
LOC101758558
LOC101758586
LOC101758587
LOC101758602
LOC101758631
LOC101758636
LOC101758645
LOC101758649
LOC101758653
LOC101758678
LOC101758680
LOC101758703
LOC101758719
LOC101758776
LOC101758777
LOC101758805
LOC101758844
LOC101758863
LOC101758871
LOC101758878
LOC101758884
LOC101758909
LOC101758911
LOC101758914
LOC101758917
LOC101758920
LOC101758929
LOC101758949
LOC101758972
LOC101758982
LOC101758994
LOC101759007
LOC101759059
LOC101759086
LOC101759100
LOC101759121
LOC101759124
LOC101759127
LOC101759148
LOC101759150
LOC101759151
LOC101759170
LOC101759208
LOC101759214
LOC101759219
LOC101759259
LOC101759291
LOC101759307
LOC101759324
LOC101759375
LOC101759386
LOC101759395
LOC101759398
LOC101759413
LOC101759415
LOC101759424
LOC101759447
LOC101759471
LOC101759474
LOC101759477
LOC101759479
LOC101759482
LOC101759506
LOC101759530
LOC101759561
LOC101759562
LOC101759563
LOC101759575
LOC101759596
LOC101759620
LOC101759653
LOC101759661
LOC101759670
LOC101759692
LOC101759707
LOC101759708
LOC101759719
LOC101759749
LOC101759772
LOC101759798
LOC101759803
LOC101759816
LOC101759832
LOC101759833
LOC101759834
LOC101759852
LOC101759857
LOC101759873
LOC101759880
LOC101759940
LOC101759969
LOC101759970
LOC101759984
LOC101759995
LOC101760014
LOC101760028
LOC101760033
LOC101760052
LOC101760061
LOC101760073
LOC101760090
LOC101760095
LOC101760110
LOC101760111
LOC101760127
LOC101760150
LOC101760154
LOC101760180
LOC101760218
LOC101760229
LOC101760249
LOC101760250
LOC101760253
LOC101760254
LOC101760262
LOC101760307
LOC101760340
LOC101760341
LOC101760345
LOC101760347
LOC101760358
LOC101760362
LOC101760392
LOC101760399
LOC101760401
LOC101760412
LOC101760413
LOC101760417
LOC101760439
LOC101760448
LOC101760463
LOC101760477
LOC101760492
LOC101760496
LOC101760504
LOC101760519
LOC101760527
LOC101760534
LOC101760546
LOC101760583
LOC101760602
LOC101760603
LOC101760607
LOC101760608
LOC101760610
LOC101760616
LOC101760632
LOC101760639
LOC101760667
LOC101760685
LOC101760689
LOC101760709
LOC101760719
LOC101760734
LOC101760744
LOC101760776
LOC101760789
LOC101760797
LOC101760812
LOC101760830
LOC101760835
LOC101760845
LOC101760868
LOC101760878
LOC101760879
LOC101760882
LOC101760894
LOC101760922
LOC101760937
LOC101760950
LOC101760951
LOC101760954
LOC101760964
LOC101760987
LOC101761051
LOC101761062
LOC101761065
LOC101761097
LOC101761100
LOC101761102
LOC101761118
LOC101761201
LOC101761233
LOC101761244
LOC101761247
LOC101761268
LOC101761274
LOC101761283
LOC101761315
LOC101761321
LOC101761327
LOC101761338
LOC101761345
LOC101761360
LOC101761389
LOC101761433
LOC101761435
LOC101761454
LOC101761474
LOC101761477
LOC101761485
LOC101761589
LOC101761605
LOC101761612
LOC101761614
LOC101761636
LOC101761638
LOC101761639
LOC101761672
LOC101761696
LOC101761697
LOC101761704
LOC101761711
LOC101761717
LOC101761718
LOC101761724
LOC101761746
LOC101761818
LOC101761821
LOC101761824
LOC101761825
LOC101761830
LOC101761839
LOC101761842
LOC101761845
LOC101761874
LOC101761904
LOC101761906
LOC101761956
LOC101761981
LOC101761986
LOC101761987
LOC101761990
LOC101761992
LOC101761993
LOC101762049
LOC101762054
LOC101762074
LOC101762079
LOC101762087
LOC101762088
LOC101762095
LOC101762122
LOC101762130
LOC101762141
LOC101762143
LOC101762155
LOC101762159
LOC101762167
LOC101762180
LOC101762192
LOC101762217
LOC101762231
LOC101762256
LOC101762259
LOC101762262
LOC101762295
LOC101762374
LOC101762381
LOC101762394
LOC101762400
LOC101762405
LOC101762437
LOC101762444
LOC101762483
LOC101762489
LOC101762493
LOC101762494
LOC101762508
LOC101762509
LOC101762517
LOC101762527
LOC101762529
LOC101762646
LOC101762650
LOC101762653
LOC101762656
LOC101762664
LOC101762675
LOC101762693
LOC101762697
LOC101762710
LOC101762715
LOC101762729
LOC101762739
LOC101762749
LOC101762766
LOC101762773
LOC101762774
LOC101762787
LOC101762791
LOC101762803
LOC101762828
LOC101762833
LOC101762859
LOC101762865
LOC101762885
LOC101762903
LOC101762946
LOC101762952
LOC101762967
LOC101762993
LOC101763007
LOC101763008
LOC101763045
LOC101763057
LOC101763058
LOC101763065
LOC101763088
LOC101763129
LOC101763133
LOC101763141
LOC101763144
LOC101763155
LOC101763165
LOC101763194
LOC101763209
LOC101763212
LOC101763237
LOC101763240
LOC101763244
LOC101763247
LOC101763258
LOC101763328
LOC101763352
LOC101763353
LOC101763361
LOC101763376
LOC101763396
LOC101763402
LOC101763422
LOC101763431
LOC101763450
LOC101763454
LOC101763490
LOC101763498
LOC101763506
LOC101763523
LOC101763533
LOC101763536
LOC101763554
LOC101763555
LOC101763562
LOC101763568
LOC101763569
LOC101763597
LOC101763618
LOC101763621
LOC101763664
LOC101763796
LOC101763822
LOC101763825
LOC101763828
LOC101763833
LOC101763874
LOC101763908
LOC101763941
LOC101763944
LOC101763947
LOC101763965
LOC101763988
LOC101763992
LOC101764016
LOC101764018
LOC101764024
LOC101764041
LOC101764053
LOC101764060
LOC101764091
LOC101764105
LOC101764134
LOC101764144
LOC101764150
LOC101764152
LOC101764171
LOC101764179
LOC101764187
LOC101764189
LOC101764195
LOC101764205
LOC101764212
LOC101764223
LOC101764227
LOC101764236
LOC101764241
LOC101764266
LOC101764269
LOC101764271
LOC101764284
LOC101764322
LOC101764362
LOC101764380
LOC101764384
LOC101764399
LOC101764405
LOC101764409
LOC101764442
LOC101764457
LOC101764459
LOC101764477
LOC101764526
LOC101764532
LOC101764536
LOC101764552
LOC101764558
LOC101764570
LOC101764577
LOC101764635
LOC101764652
LOC101764678
LOC101764689
LOC101764711
LOC101764737
LOC101764771
LOC101764776
LOC101764785
LOC101764789
LOC101764791
LOC101764795
LOC101764812
LOC101764820
LOC101764826
LOC101764832
LOC101764846
LOC101764849
LOC101764858
LOC101764887
LOC101764888
LOC101764889
LOC101764900
LOC101764906
LOC101764920
LOC101764921
LOC101764937
LOC101764946
LOC101764958
LOC101764995
LOC101765015
LOC101765021
LOC101765028
LOC101765034
LOC101765039
LOC101765057
LOC101765070
LOC101765097
LOC101765122
LOC101765127
LOC101765136
LOC101765152
LOC101765180
LOC101765197
LOC101765208
LOC101765233
LOC101765251
LOC101765312
LOC101765326
LOC101765339
LOC101765345
LOC101765346
LOC101765389
LOC101765401
LOC101765403
LOC101765423
LOC101765430
LOC101765431
LOC101765450
LOC101765462
LOC101765468
LOC101765470
LOC101765481
LOC101765509
LOC101765511
LOC101765539
LOC101765545
LOC101765574
LOC101765584
LOC101765614
LOC101765616
LOC101765623
LOC101765631
LOC101765637
LOC101765648
LOC101765671
LOC101765688
LOC101765705
LOC101765710
LOC101765712
LOC101765719
LOC101765736
LOC101765751
LOC101765772
LOC101765776
LOC101765788
LOC101765796
LOC101765827
LOC101765832
LOC101765858
LOC101765878
LOC101765912
LOC101765914
LOC101765935
LOC101765948
LOC101765950
LOC101765952
LOC101765982
LOC101766016
LOC101766027
LOC101766033
LOC101766043
LOC101766045
LOC101766046
LOC101766054
LOC101766071
LOC101766082
LOC101766099
LOC101766103
LOC101766112
LOC101766129
LOC101766141
LOC101766196
LOC101766198
LOC101766208
LOC101766213
LOC101766216
LOC101766244
LOC101766261
LOC101766278
LOC101766283
LOC101766285
LOC101766290
LOC101766301
LOC101766303
LOC101766304
LOC101766308
LOC101766334
LOC101766348
LOC101766357
LOC101766358
LOC101766360
LOC101766395
LOC101766445
LOC101766496
LOC101766498
LOC101766527
LOC101766543
LOC101766545
LOC101766549
LOC101766565
LOC101766567
LOC101766570
LOC101766571
LOC101766579
LOC101766588
LOC101766598
LOC101766604
LOC101766616
LOC101766622
LOC101766625
LOC101766632
LOC101766633
LOC101766645
LOC101766676
LOC101766679
LOC101766680
LOC101766686
LOC101766707
LOC101766721
LOC101766729
LOC101766777
LOC101766781
LOC101766797
LOC101766800
LOC101766814
LOC101766824
LOC101766827
LOC101766836
LOC101766844
LOC101766856
LOC101766859
LOC101766871
LOC101766872
LOC101766886
LOC101766908
LOC101766914
LOC101766919
LOC101766939
LOC101766952
LOC101766953
LOC101766955
LOC101766991
LOC101767008
LOC101767017
LOC101767018
LOC101767027
LOC101767035
LOC101767052
LOC101767060
LOC101767095
LOC101767127
LOC101767128
LOC101767132
LOC101767151
LOC101767155
LOC101767160
LOC101767175
LOC101767188
LOC101767247
LOC101767251
LOC101767257
LOC101767284
LOC101767297
LOC101767306
LOC101767313
LOC101767350
LOC101767367
LOC101767386
LOC101767388
LOC101767431
LOC101767433
LOC101767436
LOC101767447
LOC101767454
LOC101767456
LOC101767492
LOC101767524
LOC101767531
LOC101767545
LOC101767548
LOC101767605
LOC101767629
LOC101767641
LOC101767643
LOC101767655
LOC101767656
LOC101767657
LOC101767663
LOC101767666
LOC101767683
LOC101767688
LOC101767696
LOC101767714
LOC101767734
LOC101767736
LOC101767763
LOC101767767
LOC101767768
LOC101767799
LOC101767801
LOC101767825
LOC101767848
LOC101767874
LOC101767880
LOC101767899
LOC101767946
LOC101767964
LOC101767967
LOC101767991
LOC101768013
LOC101768103
LOC101768112
LOC101768121
LOC101768132
LOC101768136
LOC101768145
LOC101768164
LOC101768185
LOC101768206
LOC101768212
LOC101768247
LOC101768312
LOC101768333
LOC101768335
LOC101768384
LOC101768427
LOC101768432
LOC101768449
LOC101768451
LOC101768462
LOC101768466
LOC101768493
LOC101768499
LOC101768521
LOC101768550
LOC101768561
LOC101768568
LOC101768578
LOC101768628
LOC101768637
LOC101768643
LOC101768651
LOC101768704
LOC101768731
LOC101768742
LOC101768751
LOC101768774
LOC101768785
LOC101768818
LOC101768821
LOC101768834
LOC101768843
LOC101768851
LOC101768864
LOC101768873
LOC101768892
LOC101768960
LOC101768962
LOC101768973
LOC101769041
LOC101769047
LOC101769050
LOC101769054
LOC101769058
LOC101769069
LOC101769070
LOC101769093
LOC101769096
LOC101769109
LOC101769132
LOC101769136
LOC101769147
LOC101769159
LOC101769161
LOC101769170
LOC101769174
LOC101769184
LOC101769186
LOC101769199
LOC101769230
LOC101769278
LOC101769310
LOC101769330
LOC101769333
LOC101769334
LOC101769341
LOC101769354
LOC101769368
LOC101769389
LOC101769454
LOC101769477
LOC101769491
LOC101769519
LOC101769533
LOC101769542
LOC101769556
LOC101769559
LOC101769580
LOC101769585
LOC101769604
LOC101769613
LOC101769644
LOC101769659
LOC101769667
LOC101769670
LOC101769679
LOC101769695
LOC101769705
LOC101769734
LOC101769754
LOC101769768
LOC101769770
LOC101769771
LOC101769776
LOC101769809
LOC101769812
LOC101769842
LOC101769884
LOC101769926
LOC101769930
LOC101769941
LOC101770014
LOC101770080
LOC101770088
LOC101770101
LOC101770116
LOC101770125
LOC101770144
LOC101770147
LOC101770161
LOC101770187
LOC101770192
LOC101770199
LOC101770203
LOC101770221
LOC101770226
LOC101770232
LOC101770233
LOC101770235
LOC101770250
LOC101770267
LOC101770269
LOC101770279
LOC101770285
LOC101770304
LOC101770312
LOC101770334
LOC101770363
LOC101770372
LOC101770386
LOC101770412
LOC101770415
LOC101770424
LOC101770435
LOC101770449
LOC101770504
LOC101770506
LOC101770548
LOC101770571
LOC101770581
LOC101770594
LOC101770622
LOC101770683
LOC101770684
LOC101770692
LOC101770774
LOC101770775
LOC101770786
LOC101770792
LOC101770802
LOC101770815
LOC101770849
LOC101770852
LOC101770857
LOC101770867
LOC101770869
LOC101770897
LOC101770898
LOC101770903
LOC101770906
LOC101770976
LOC101770981
LOC101770993
LOC101771000
LOC101771047
LOC101771051
LOC101771066
LOC101771078
LOC101771112
LOC101771122
LOC101771149
LOC101771164
LOC101771186
LOC101771187
LOC101771212
LOC101771230
LOC101771231
LOC101771263
LOC101771270
LOC101771271
LOC101771280
LOC101771289
LOC101771297
LOC101771311
LOC101771320
LOC101771332
LOC101771350
LOC101771394
LOC101771409
LOC101771419
LOC101771434
LOC101771470
LOC101771474
LOC101771509
LOC101771548
LOC101771556
LOC101771557
LOC101771562
LOC101771582
LOC101771585
LOC101771586
LOC101771592
LOC101771620
LOC101771622
LOC101771623
LOC101771643
LOC101771680
LOC101771703
LOC101771724
LOC101771729
LOC101771740
LOC101771750
LOC101771760
LOC101771767
LOC101771770
LOC101771806
LOC101771807
LOC101771830
LOC101771864
LOC101771866
LOC101771870
LOC101771871
LOC101771873
LOC101771874
LOC101771949
LOC101771981
LOC101772024
LOC101772033
LOC101772046
LOC101772060
LOC101772065
LOC101772095
LOC101772120
LOC101772166
LOC101772224
LOC101772250
LOC101772252
LOC101772253
LOC101772264
LOC101772294
LOC101772298
LOC101772321
LOC101772325
LOC101772339
LOC101772366
LOC101772367
LOC101772385
LOC101772390
LOC101772420
LOC101772439
LOC101772450
LOC101772465
LOC101772486
LOC101772493
LOC101772513
LOC101772518
LOC101772566
LOC101772569
LOC101772571
LOC101772602
LOC101772617
LOC101772626
LOC101772642
LOC101772653
LOC101772684
LOC101772711
LOC101772738
LOC101772739
LOC101772755
LOC101772758
LOC101772821
LOC101772854
LOC101772860
LOC101772867
LOC101772901
LOC101772910
LOC101772912
LOC101772922
LOC101772928
LOC101772931
LOC101772938
LOC101772944
LOC101772953
LOC101772976
LOC101772981
LOC101773008
LOC101773009
LOC101773053
LOC101773060
LOC101773073
LOC101773114
LOC101773133
LOC101773135
LOC101773148
LOC101773153
LOC101773157
LOC101773174
LOC101773177
LOC101773184
LOC101773217
LOC101773229
LOC101773233
LOC101773254
LOC101773281
LOC101773283
LOC101773297
LOC101773318
LOC101773323
LOC101773324
LOC101773335
LOC101773352
LOC101773356
LOC101773415
LOC101773443
LOC101773452
LOC101773455
LOC101773463
LOC101773471
LOC101773511
LOC101773532
LOC101773568
LOC101773576
LOC101773589
LOC101773599
LOC101773620
LOC101773708
LOC101773718
LOC101773737
LOC101773752
LOC101773807
LOC101773823
LOC101773830
LOC101773832
LOC101773847
LOC101773942
LOC101773944
LOC101773947
LOC101773992
LOC101774013
LOC101774015
LOC101774016
LOC101774024
LOC101774029
LOC101774032
LOC101774034
LOC101774035
LOC101774053
LOC101774073
LOC101774094
LOC101774096
LOC101774118
LOC101774126
LOC101774144
LOC101774167
LOC101774268
LOC101774273
LOC101774274
LOC101774328
LOC101774332
LOC101774345
LOC101774369
LOC101774378
LOC101774387
LOC101774437
LOC101774464
LOC101774500
LOC101774502
LOC101774507
LOC101774566
LOC101774569
LOC101774589
LOC101774596
LOC101774607
LOC101774618
LOC101774649
LOC101774661
LOC101774664
LOC101774672
LOC101774689
LOC101774727
LOC101774728
LOC101774734
LOC101774762
LOC101774783
LOC101774811
LOC101774822
LOC101774826
LOC101774828
LOC101774831
LOC101774840
LOC101774866
LOC101774920
LOC101774937
LOC101774983
LOC101775016
LOC101775054
LOC101775064
LOC101775074
LOC101775081
LOC101775082
LOC101775093
LOC101775103
LOC101775127
LOC101775128
LOC101775169
LOC101775174
LOC101775186
LOC101775189
LOC101775194
LOC101775207
LOC101775232
LOC101775237
LOC101775297
LOC101775351
LOC101775358
LOC101775410
LOC101775420
LOC101775440
LOC101775451
LOC101775465
LOC101775472
LOC101775482
LOC101775493
LOC101775549
LOC101775555
LOC101775578
LOC101775586
LOC101775597
LOC101775633
LOC101775670
LOC101775696
LOC101775703
LOC101775727
LOC101775740
LOC101775746
LOC101775786
LOC101775794
LOC101775888
LOC101775907
LOC101775915
LOC101775923
LOC101775936
LOC101775955
LOC101775978
LOC101775987
LOC101775997
LOC101776033
LOC101776040
LOC101776051
LOC101776068
LOC101776073
LOC101776133
LOC101776139
LOC101776181
LOC101776182
LOC101776193
LOC101776195
LOC101776223
LOC101776230
LOC101776237
LOC101776301
LOC101776331
LOC101776372
LOC101776474
LOC101776495
LOC101776508
LOC101776514
LOC101776533
LOC101776585
LOC101776608
LOC101776682
LOC101776705
LOC101776712
LOC101776724
LOC101776725
LOC101776745
LOC101776752
LOC101776764
LOC101776766
LOC101776835
LOC101776836
LOC101776843
LOC101776844
LOC101776860
LOC101776921
LOC101776934
LOC101776942
LOC101776952
LOC101776956
LOC101776959
LOC101776961
LOC101776976
LOC101777019
LOC101777028
LOC101777039
LOC101777048
LOC101777069
LOC101777097
LOC101777126
LOC101777137
LOC101777143
LOC101777179
LOC101777186
LOC101777211
LOC101777219
LOC101777221
LOC101777230
LOC101777245
LOC101777251
LOC101777252
LOC101777277
LOC101777367
LOC101777369
LOC101777376
LOC101777386
LOC101777391
LOC101777396
LOC101777399
LOC101777404
LOC101777418
LOC101777441
LOC101777458
LOC101777459
LOC101777485
LOC101777507
LOC101777520
LOC101777526
LOC101777570
LOC101777589
LOC101777590
LOC101777606
LOC101777640
LOC101777655
LOC101777663
LOC101777712
LOC101777737
LOC101777757
LOC101777763
LOC101777811
LOC101777825
LOC101777838
LOC101777848
LOC101777856
LOC101777885
LOC101777887
LOC101777917
LOC101777935
LOC101777941
LOC101777958
LOC101777975
LOC101777992
LOC101778009
LOC101778023
LOC101778030
LOC101778057
LOC101778061
LOC101778077
LOC101778080
LOC101778092
LOC101778102
LOC101778112
LOC101778133
LOC101778177
LOC101778186
LOC101778196
LOC101778217
LOC101778232
LOC101778239
LOC101778260
LOC101778265
LOC101778271
LOC101778283
LOC101778298
LOC101778314
LOC101778320
LOC101778330
LOC101778347
LOC101778352
LOC101778356
LOC101778359
LOC101778422
LOC101778440
LOC101778473
LOC101778486
LOC101778487
LOC101778496
LOC101778528
LOC101778535
LOC101778547
LOC101778552
LOC101778553
LOC101778559
LOC101778580
LOC101778592
LOC101778595
LOC101778622
LOC101778635
LOC101778659
LOC101778675
LOC101778678
LOC101778695
LOC101778697
LOC101778704
LOC101778722
LOC101778732
LOC101778754
LOC101778756
LOC101778761
LOC101778777
LOC101778812
LOC101778828
LOC101778832
LOC101778837
LOC101778838
LOC101778847
LOC101778856
LOC101778864
LOC101778890
LOC101778897
LOC101778909
LOC101778944
LOC101778958
LOC101778974
LOC101778978
LOC101779020
LOC101779031
LOC101779038
LOC101779043
LOC101779047
LOC101779048
LOC101779058
LOC101779059
LOC101779072
LOC101779083
LOC101779125
LOC101779137
LOC101779159
LOC101779162
LOC101779165
LOC101779186
LOC101779211
LOC101779215
LOC101779235
LOC101779236
LOC101779251
LOC101779303
LOC101779314
LOC101779315
LOC101779322
LOC101779332
LOC101779352
LOC101779355
LOC101779357
LOC101779368
LOC101779375
LOC101779377
LOC101779394
LOC101779402
LOC101779410
LOC101779436
LOC101779458
LOC101779488
LOC101779512
LOC101779520
LOC101779538
LOC101779576
LOC101779622
LOC101779650
LOC101779654
LOC101779726
LOC101779729
LOC101779735
LOC101779750
LOC101779751
LOC101779752
LOC101779790
LOC101779804
LOC101779806
LOC101779808
LOC101779819
LOC101779826
LOC101779828
LOC101779835
LOC101779837
LOC101779847
LOC101779869
LOC101779885
LOC101779897
LOC101779927
LOC101779929
LOC101779938
LOC101779943
LOC101779972
LOC101779988
LOC101780003
LOC101780012
LOC101780027
LOC101780037
LOC101780062
LOC101780072
LOC101780090
LOC101780094
LOC101780095
LOC101780111
LOC101780127
LOC101780131
LOC101780184
LOC101780186
LOC101780204
LOC101780252
LOC101780280
LOC101780296
LOC101780325
LOC101780330
LOC101780331
LOC101780335
LOC101780371
LOC101780392
LOC101780409
LOC101780425
LOC101780441
LOC101780458
LOC101780479
LOC101780491
LOC101780493
LOC101780502
LOC101780508
LOC101780528
LOC101780562
LOC101780616
LOC101780622
LOC101780660
LOC101780690
LOC101780704
LOC101780709
LOC101780727
LOC101780767
LOC101780768
LOC101780790
LOC101780801
LOC101780809
LOC101780831
LOC101780834
LOC101780852
LOC101780865
LOC101780870
LOC101780884
LOC101780888
LOC101780909
LOC101780915
LOC101780930
LOC101780967
LOC101780969
LOC101781012
LOC101781029
LOC101781038
LOC101781051
LOC101781052
LOC101781054
LOC101781058
LOC101781063
LOC101781067
LOC101781072
LOC101781125
LOC101781153
LOC101781174
LOC101781181
LOC101781197
LOC101781215
LOC101781231
LOC101781264
LOC101781279
LOC101781283
LOC101781289
LOC101781303
LOC101781321
LOC101781355
LOC101781374
LOC101781378
LOC101781398
LOC101781405
LOC101781415
LOC101781422
LOC101781438
LOC101781451
LOC101781504
LOC101781510
LOC101781519
LOC101781545
LOC101781566
LOC101781604
LOC101781605
LOC101781624
LOC101781637
LOC101781655
LOC101781694
LOC101781701
LOC101781702
LOC101781735
LOC101781749
LOC101781754
LOC101781760
LOC101781803
LOC101781817
LOC101781826
LOC101781844
LOC101781846
LOC101781881
LOC101781899
LOC101781908
LOC101781915
LOC101781919
LOC101781927
LOC101781949
LOC101781961
LOC101781987
LOC101782003
LOC101782007
LOC101782008
LOC101782011
LOC101782031
LOC101782058
LOC101782069
LOC101782078
LOC101782095
LOC101782100
LOC101782105
LOC101782135
LOC101782147
LOC101782150
LOC101782171
LOC101782190
LOC101782212
LOC101782216
LOC101782228
LOC101782230
LOC101782256
LOC101782271
LOC101782279
LOC101782299
LOC101782308
LOC101782330
LOC101782339
LOC101782343
LOC101782357
LOC101782363
LOC101782364
LOC101782380
LOC101782386
LOC101782411
LOC101782416
LOC101782439
LOC101782470
LOC101782471
LOC101782483
LOC101782491
LOC101782504
LOC101782506
LOC101782527
LOC101782531
LOC101782556
LOC101782610
LOC101782615
LOC101782632
LOC101782636
LOC101782649
LOC101782650
LOC101782657
LOC101782677
LOC101782683
LOC101782692
LOC101782716
LOC101782748
LOC101782753
LOC101782783
LOC101782795
LOC101782822
LOC101782829
LOC101782843
LOC101782848
LOC101782874
LOC101782916
LOC101782920
LOC101782938
LOC101782944
LOC101782962
LOC101782974
LOC101782978
LOC101782989
LOC101783063
LOC101783067
LOC101783069
LOC101783071
LOC101783097
LOC101783123
LOC101783127
LOC101783156
LOC101783210
LOC101783220
LOC101783224
LOC101783278
LOC101783294
LOC101783295
LOC101783322
LOC101783330
LOC101783358
LOC101783367
LOC101783370
LOC101783383
LOC101783391
LOC101783395
LOC101783424
LOC101783429
LOC101783432
LOC101783443
LOC101783450
LOC101783467
LOC101783481
LOC101783506
LOC101783554
LOC101783565
LOC101783575
LOC101783592
LOC101783624
LOC101783630
LOC101783635
LOC101783710
LOC101783712
LOC101783717
LOC101783718
LOC101783767
LOC101783769
LOC101783781
LOC101783811
LOC101783815
LOC101783826
LOC101783835
LOC101783868
LOC101783871
[truncated: 4,833 more rows]
